# Supplementary material
Source: publisher figshare collection journal article supplement (https://acs.figshare.com/ndownloader/files/20069348)
Supplement: Supplementary file 1 [file 20069348]

## **Supporting Information**

### **Estimation of extracellular matrix production using cultured-chondrocyte-based gate ion-sensitive field-effect transistor**

Hiroto Satake and Toshiya Sakata\*

Department of Materials Engineering, School of Engineering, The University of Tokyo,

7-3-1 Hongo, Bunkyo-ku, Tokyo 113-8656, Japan

\*Corresponding author. E-mail: sakata@biofet.t.u-tokyo.ac.jp

#### **Table of Contents**

**Figure S1.** Conceptual structure of solution-gate ISFET sensor for electrical measurement.

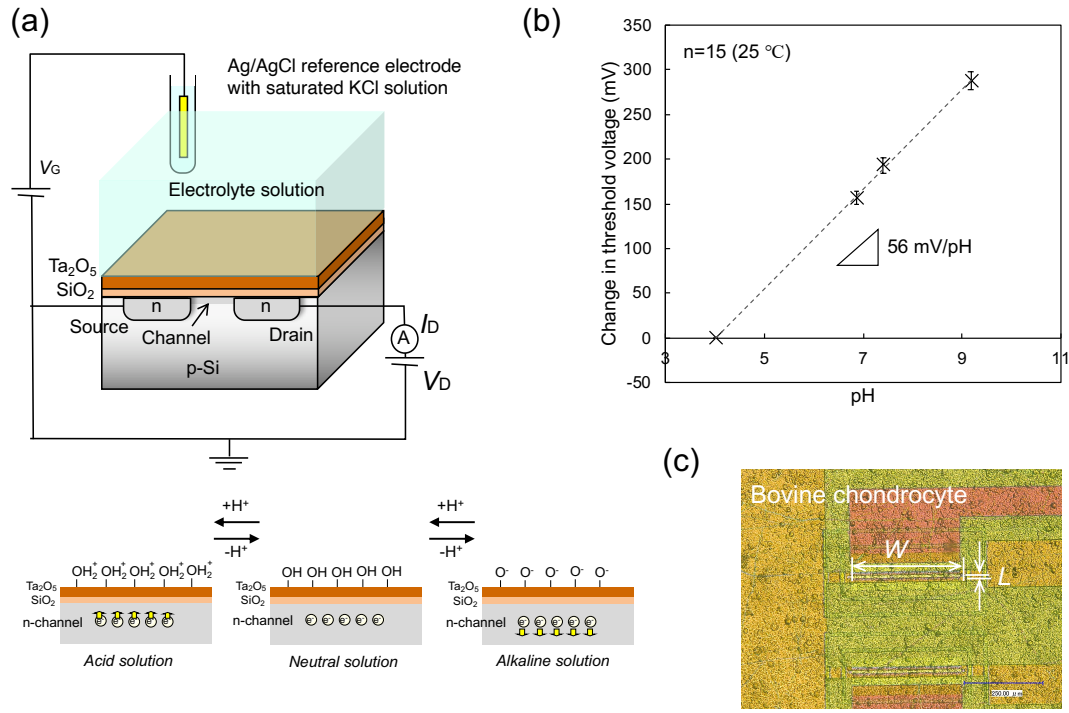

**Figure S1** (a) Conceptual structure of solution-gate ISFET sensor for electrical measurement. The channel size, a width ( $W$ ) and length ( $L$ ) were designed to be 340 and 10  $\mu$ m, respectively. Hydroxy groups at the oxide membrane in a solution exhibit the equilibrium reaction with hydrogen ions. (b) Calibration curve, which was analyzed on the basis of  $V_G$ – $I_D$  electrical characteristic. In the  $V_G$ – $I_D$  electrical characteristic of the ISFET sensors used in this study, the shift in  $V_G$  at a constant  $I_D$  of 1 mA was estimated as the change in  $V_T$  when the pH was changed from pH 4.01 to 9.18. The pH sensitivity of this ISFET sensor was about 56 mV/pH, which almost showed a Nernstian response at 25 °C.  $V_G$  at pH 4.01 was offset to 0. (c) Photograph of chondrocytes cultured on the gate insulator for 3 weeks in the culture medium with 1% (v/v) ITS and 200  $\mu$ g/mL APM. Scale bar, 250  $\mu$ m.
